# Supplementary material for: Large-Scale Movements of IF3 and tRNA during Bacterial Translation Initiation
Source: PubMed Central journal article supplement (PMC5037330; doi:10.1016/j.cell.2016.08.074), 2016-09-22
Supplement: mmc1.pdf [file mmc1.pdf]

**Cell, Volume 167**

**Supplemental Information**

**Large-Scale Movements of IF3 and tRNA  
during Bacterial Translation Initiation**

**Tanweer Hussain, Jose L. Llácer, Brian T. Wimberly, Jeffrey S. Kieft, and V. Ramakrishnan**

**Table S1. Refinement and model statistics, Related to Figure 1.**

|                                                   | PIC-1A                       | PIC-1B                       | PIC-1C                       | PIC-2A                       | PIC-2B                       | PIC-2C                       | PIC-3                        | PIC-4                        | PIC-III                      |
|---------------------------------------------------|------------------------------|------------------------------|------------------------------|------------------------------|------------------------------|------------------------------|------------------------------|------------------------------|------------------------------|
| <b>Model Composition</b>                          |                              |                              |                              |                              |                              |                              |                              |                              |                              |
| Non-hydrogen atoms                                | 54057                        | 54036                        | 54058                        | 55811                        | 55695                        | 55681                        | 55727                        | 55151                        | 59482                        |
| Protein residues                                  | 4162                         | 4160                         | 4161                         | 4251                         | 4241                         | 4234                         | 4238                         | 4166                         | 4739                         |
| RNA bases                                         | 1534                         | 1533                         | 1534                         | 1611                         | 1608                         | 1610                         | 1611                         | 1611                         | 1611                         |
| <b>Refinement</b>                                 |                              |                              |                              |                              |                              |                              |                              |                              |                              |
| Resolution used for refinement (Å)                | 3.6                          | 4.4                          | 5.4                          | 4.3                          | 4.5                          | 5.2                          | 4.25                         | 4.15                         | 5.1                          |
| Map sharpening B-factor (Å)                       | -87                          | -130                         | -157                         | -89                          | -101                         | -103                         | -107                         | -108                         | -180                         |
| Average B-factor (Å)                              | 89.7                         | -                            | -                            | -                            | -                            | -                            | -                            | -                            | -                            |
| Fourier Shell Correlation (FSC)*                  | 0.83                         | 0.66                         | 0.73                         | 0.73                         | 0.71                         | 0.72                         | 0.72                         | 0.75                         | 0.71                         |
| <b>Rms deviations</b>                             |                              |                              |                              |                              |                              |                              |                              |                              |                              |
| Bonds (Å)                                         | 0.006                        | 0.008                        | 0.008                        | 0.007                        | 0.065                        | 0.008                        | 0.007                        | 0.006                        | 0.006                        |
| Angles (°)                                        | 1.263                        | 1.306                        | 1.287                        | 1.292                        | 1.220                        | 1.305                        | 1.273                        | 1.310                        | 1.137                        |
| <b>Validation (proteins)</b>                      |                              |                              |                              |                              |                              |                              |                              |                              |                              |
| Molprobit score<br>(Percentile in brackets)       | 3.36<br>(74 <sup>th</sup> )  | 3.37<br>(75 <sup>th</sup> )  | 3.33<br>(77 <sup>th</sup> )  | 3.40<br>(74 <sup>th</sup> )  | 3.25<br>(81 <sup>st</sup> )  | 3.45<br>(71 <sup>st</sup> )  | 3.43<br>(73 <sup>rd</sup> )  | 3.53<br>(65 <sup>th</sup> )  | 3.14<br>(84 <sup>th</sup> )  |
| Clashscore, all atoms<br>(Percentile in brackets) | 16.84<br>(97 <sup>th</sup> ) | 16.05<br>(97 <sup>th</sup> ) | 16.19<br>(97 <sup>th</sup> ) | 17.23<br>(97 <sup>th</sup> ) | 17.00<br>(97 <sup>th</sup> ) | 18.85<br>(97 <sup>th</sup> ) | 16.97<br>(97 <sup>th</sup> ) | 19.27<br>(97 <sup>th</sup> ) | 13.17<br>(97 <sup>th</sup> ) |
| Good rotamers (%)                                 | 60.67                        | 61.19                        | 62.28                        | 60.24                        | 64.93                        | 60.45                        | 59.12                        | 55.20                        | 66.80                        |
| <b>Ramachandran plot</b>                          |                              |                              |                              |                              |                              |                              |                              |                              |                              |
| Favored (%)                                       | 85.37                        | 84.71                        | 85.02                        | 85.29                        | 88.06                        | 83.32                        | 84.00                        | 83.23                        | 87.29                        |
| Outliers (%)                                      | 4.18                         | 3.99                         | 3.10                         | 3.97                         | 3.13                         | 3.34                         | 3.84                         | 4.26                         | 2.80                         |
| <b>Validation (RNA)</b>                           |                              |                              |                              |                              |                              |                              |                              |                              |                              |
| Correct sugar puckers(%)                          | 96.48                        | 96.02                        | 96.41                        | 96.15                        | 96.64                        | 96.28                        | 96.65                        | 96.46                        | 95.16                        |
| Good backbone conformations(%)                    | 70.27                        | 68.75                        | 70.34                        | 71.64                        | 71.71                        | 69.96                        | 72.26                        | 69.09                        | 72.33                        |

\* FSC=  $\Sigma(N_{\text{shell}} \text{FSC}_{\text{shell}}) / \Sigma(N_{\text{shell}})$ , where  $\text{FSC}_{\text{shell}}$  is the FSC in a given shell,  $N_{\text{shell}}$  is the number of "structure factors" in the shell.  $\text{FSC}_{\text{shell}} = \Sigma(F_{\text{model}} F_{\text{EM}}) / (\sqrt{\Sigma(|F_{\text{model}}|^2)} \sqrt{\Sigma(|F_{\text{EM}}|^2)})$



**Table S3. 30S head position in PICs, Related to Figure 2.**

| <b>PICs</b>    | <b>Degree of rotation of 30S head<br/>(degree of rotation)</b> | <b>Open/closed conformation of<br/>30S</b> |
|----------------|----------------------------------------------------------------|--------------------------------------------|
| <b>PIC-1A</b>  | Canonical position (0°)                                        | Closed                                     |
| <b>PIC-1B</b>  | Swiveled position (~ 5°)                                       | Closed                                     |
| <b>PIC-1C</b>  | (0°)                                                           | Open (30S head moves up)                   |
| <b>PIC-2A</b>  | (~ 3 °)                                                        | Open (30S head moves up)                   |
| <b>PIC-2B</b>  | Swiveled position (~ 9°)                                       | Closed                                     |
| <b>PIC-2C</b>  | Canonical position (0°)                                        | Closed                                     |
| <b>PIC-3</b>   | Canonical position (0°)                                        | Closed                                     |
| <b>PIC-4</b>   | Canonical position (0°)                                        | Closed                                     |
|                |                                                                |                                            |
| <b>PIC-I</b>   | Canonical position (0°)                                        | Closed                                     |
| <b>PIC-II</b>  | (~ 4°)                                                         | Closed                                     |
| <b>PIC-III</b> | Canonical position (0°)                                        | Closed                                     |
